# Supplementary material for: Uncommon EGFR Compound Mutations in Non-Small Cell Lung Cancer (NSCLC): A Systematic Review of Available Evidence
Source: MDPI journal article supplement (doi:10.3390/curroncol29010024), 2022-01-09
Supplement: s1 [file s1]

Supplementary Table S1. Details of the studies included in the systematic review

| Studies included                                                | Study type                                                       |
|-----------------------------------------------------------------|------------------------------------------------------------------|
| Cho, J.H., et al., J Clin Oncol, 2020.                          | Prospective trial                                                |
| Yang, J.C., et al., Lancet Oncol, 2015.                         | Pooled analysis of prospective studies                           |
| Passaro, A., et al., Front Oncol, 2021.                         | Pooled analysis of prospective studies                           |
| Syahrudin, E., et al., Lung Cancer, 2018.                       | Retrospective study                                              |
| Zaini, J., et al., Cancer Rep, 2019.                            | Prospective study                                                |
| Jing, C., et al., Molecular medicine reports, 2018.             | Translational study                                              |
| Namba, K., et al., BMC Cancer, 2019.                            | Retrospective study                                              |
| Mao, L., et al., Pathol Oncol Res, 2021.                        | Retrospective study                                              |
| Zhou, Y., et al., Frontiers in Oncology, 2021.                  | Retrospective study                                              |
| Shi Yeen, T.N., et al., Journal of biomedical science, 2013.    | Translational study                                              |
| Wen, S., et al., Oncologist, 2019.                              | Translational study                                              |
| Evans, M., et al., Pathol Oncol Res, 2019.                      | Retrospective study                                              |
| Martin, J., et al., Clin Lung Cancer, 2019.                     | Retrospective study                                              |
| Sousa, A.C., et al., Lung Cancer, 2020.                         | Retrospective study                                              |
| Hayashi, T., et al., Hum Pathol, 2020.                          | Retrospective study                                              |
| Tam, I.Y., et al., Mol Cancer Ther, 2009.                       | Preclinical study                                                |
| Kimura, S., et al., Cancer science, 2018.                       | Preclinical study                                                |
| Gristina, V., et al., Cancer Treat Rev, 2020.                   | Systematic review                                                |
| Floc'h, N., et al., Mol Cancer Ther, 2020.                      | Preclinical study                                                |
| Kohsaka, S., et al., Sci Transl Med, 2017.                      | Preclinical + retrospective study                                |
| Akula, S., et al., Journal of Thoracic Oncology, 2018.          | Preclinical study                                                |
| Peng, L., Z.-G. Song, and S.-C. Jiao, Scientific Reports, 2014. | Retrospective study                                              |
| Li, H., et al., Lung Cancer, 2019.                              | Retrospective study                                              |
| Rossi, S., et al., Curr Probl Cancer, 2021.                     | Retrospective study                                              |
| Passaro, A., et al., Clin Lung Cancer, 2019.                    | Retrospective study                                              |
| Moran, T., et al., Clin Lung Cancer, 2020.                      | Retrospective study                                              |
| Chen, K., et al., Cancer Chemother Pharmacol, 2017.             | Retrospective study                                              |
| Lei, L., et al., Cancer Med, 2020.                              | Retrospective study                                              |
| Xu, J., et al., Lung Cancer, 2016.                              | Retrospective study                                              |
| Jung, H.A., et al., Biology (Basel), 2020.                      | Retrospective study                                              |
| Peng, L., Z. Song, and S. Jiao, Onco Targets Ther, 2015         | Retrospective study                                              |
| Wu, S.G., et al., Oncologist, 2008.                             | Retrospective study                                              |
| Hata, A., et al., J Thorac Oncol, 2010.                         | Retrospective study                                              |
| Kobayashi, S., et al., J Thorac Oncol, 2013.                    | Retrospective study                                              |
| Wu, J.Y., et al., Clin Cancer Res, 2011.                        | Retrospective study                                              |
| Zhang, B., et al., Cancer, 2018.                                | Retrospective study                                              |
| Tan, J., et al., Front Oncol, 2021.                             | Retrospective study                                              |
| Yang, J.C.-H., et al., Journal of Thoracic Oncology, 2020.      | Pooled analysis of prospective/retrospective/case report studies |
| Wu, S.G., et al., Ther Adv Med Oncol, 2020.                     | Retrospective study                                              |
| Singh, V., et al., Lung Cancer, 2020.                           | Combined retrospective/prospective                               |
| Lin, Y.T., et al., Lung Cancer, 2020.                           | Retrospective study                                              |
| Bar, J., et al., 1206P Annals of Oncology, 2021.                | Conference abstract                                              |
| Miura, S., et al., Abstract LB138: Cancer Research, 2021.       | Conference abstract                                              |
| Ji, J., et al., Journal of Clinical Oncology, 2020.             | Conference abstract                                              |

N.R.: not reported
